# Supplementary material for: Efficacy of Rg1-Oil Adjuvant on Inducing Immune Responses against Bordetella bronchiseptica in Rabbits
Source: Hindawi journal article supplement (doi:10.1155/2021/8835919), 2021-01-28
Supplement: f1 [file 8835919.f1.zip]

|        | IL-2     | IL-2     | IL-2     |
|--------|----------|----------|----------|
| Group1 | 44.58621 | 40.7931  | 46.31034 |
| Group2 | 30.44828 | 33.2069  | 30.10345 |
| Group3 | 21.13793 | 25.96552 | 23.89655 |
| Group4 | 19.06897 | 27       | 25.27586 |
| Group5 | 10.10345 | 14.58621 | 10.7931  |
| Group6 | 10.44828 | 8.379311 | 8.379311 |
