# Supplementary material for: Efficacy of Rg1-Oil Adjuvant on Inducing Immune Responses against Bordetella bronchiseptica in Rabbits
Source: Hindawi journal article supplement (doi:10.1155/2021/8835919), 2021-01-28
Supplement: f1 [file 8835919.f1.zip]

|        | Group 1 |
|--------|---------|---------|---------|---------|---------|
| 10 day | 15.3    | 13.2    | 10.2    | 16.7    |         |
| 15 day | 10.3    | 10.6    | 10.7    |         |         |
| 21 day | 10.8    | 9.2     | 12.1    | 9.7     |         |
| 35 day | 10.3    | 10.6    | 11.6    | 10.6    |         |

|        | Group 2 |
|--------|---------|---------|---------|---------|---------|
| 10 day | 12.9    | 13      | 12      |         |         |
| 15 day | 14      | 11.4    | 14.2    | 15      | 15      |
| 21 day | 13.5    | 11      | 11.3    | 11.5    | 11.5    |
| 35 day | 18.3    | 14.5    | 15.3    | 15.4    | 15.1    |

|        | Group 3 | Group 3 | Group 3 | Group 3 |  |
|--------|---------|---------|---------|---------|--|
| 10 day | 8.4     | 11.4    | 13.4    |         |  |
| 15 day | 11.3    | 11.1    | 13      |         |  |
| 21 day | 11.8    | 11.1    | 12.4    |         |  |
| 35 day | 12.3    | 10      | 12.3    | 10.1    |  |

|        | Group 4 |
|--------|---------|---------|---------|---------|---------|
| 10 day | 14.3    | 11.4    | 13.2    | 9.5     |         |
| 15 day | 10.5    | 11.5    | 11      |         |         |
| 21 day | 6.5     | 6.9     | 9.3     | 7       | 9.1     |
| 35 day | 6.8     | 7.9     | 7.6     | 6.1     |         |

|        | Group 5 |
|--------|---------|---------|---------|---------|---------|
| 10 day | 6.2     | 8.7     | 6.6     | 7.4     |         |
| 15 day | 5.2     | 7.5     | 8.1     |         |         |
| 21 day | 5.7     | 5.2     | 6.5     | 7.1     | 7.2     |
| 35 day | 6.8     | 7       | 8.1     |         |         |

|        | Group 6 |
|--------|---------|---------|---------|---------|---------|
| 10 day | 3.6     | 3.1     | 5.7     |         |         |
| 15 day | 4.9     | 5.2     | 7.8     | 5.5     | 5.1     |
| 21 day | 7.9     | 5.5     | 5.3     | 6.1     |         |
| 35 day | 7.6     | 6.7     | 7       |         |         |
