# Supplementary material for: Efficacy of Rg1-Oil Adjuvant on Inducing Immune Responses against Bordetella bronchiseptica in Rabbits
Source: Hindawi journal article supplement (doi:10.1155/2021/8835919), 2021-01-28
Supplement: f1 [file 8835919.f1.zip]

|        | WBC/( $\times 10^9$ /L) | WBC/( $\times 10^9$ /L) | WBC/( $\times 10^9$ /L) |
|--------|-------------------------|-------------------------|-------------------------|
| Group1 | 12.1                    | 11.5                    | 11.2                    |
| Group2 | 10.8                    | 9.7                     | 13.7                    |
| Group3 | 13.9                    | 10.3                    | 11                      |
| Group4 | 8.3                     | 8                       | 9.2                     |
| Group5 | 5.8                     | 4.1                     | 4.6                     |
| Group6 | 3.4                     | 3.3                     | 3.5                     |
