# Supplementary material for: Efficacy of Rg1-Oil Adjuvant on Inducing Immune Responses against Bordetella bronchiseptica in Rabbits
Source: Hindawi journal article supplement (doi:10.1155/2021/8835919), 2021-01-28
Supplement: f1 [file 8835919.f1.zip]

|        | W-MCC/(×W-MCC/(×W-MCC/(×103/μ L) |     |     |
|--------|----------------------------------|-----|-----|
| Group1 | 1.4                              | 1.4 | 2.7 |
| Group2 | 1.4                              | 1.4 | 2.9 |
| Group3 | 1.8                              | 1.8 | 2.5 |
| Group4 | 1.4                              | 2.4 | 2.1 |
| Group5 | 0.3                              | 0.4 | 0.6 |
| Group6 | 0.3                              | 0.2 | 0.4 |
