# Supplementary material for: Efficacy of Rg1-Oil Adjuvant on Inducing Immune Responses against Bordetella bronchiseptica in Rabbits
Source: Hindawi journal article supplement (doi:10.1155/2021/8835919), 2021-01-28
Supplement: f1 [file 8835919.f1.zip]

|        | Group 1 |
|--------|---------|---------|---------|---------|---------|---------|
| 0 day  | 2.1     | 2.4     | 2.3     | 2       | 2.1     | 2.4     |
| 5 day  | 2       | 2.4     | 2.3     | 2       | 2.1     | 2.3     |
| 10 day | 2.3     | 2.7     | 2.5     | 2.2     | 2.2     | 2.3     |
| 15 day | 2.1     | 2.3     | 2.3     | 2.2     | 2.4     | 2.4     |
| 35 day | 2.3     | 2.8     | 2.6     | 2.3     | 2.5     | 2.5     |

|        | Group 2 |
|--------|---------|---------|---------|---------|---------|---------|
| 0 day  | 2.4     | 2.1     | 2.2     | 2       | 2       |         |
| 5 day  | 2.2     | 2       | 2.2     | 2       | 2       |         |
| 10 day | 2.2     | 2.1     | 2.2     | 2.1     | 2.1     |         |
| 15 day | 2.2     | 2.1     | 2.2     | 2.2     | 2.1     |         |
| 35 day | 2.4     | 2.2     | 2.4     | 2.3     | 2.4     |         |

|        | Group 3 |
|--------|---------|---------|---------|---------|---------|---------|
| 0 day  | 2.2     | 2.1     | 2.2     | 2.1     | 2.2     | 2.1     |
| 5 day  | 1.9     | 2       | 2       | 2       | 2.1     | 2.1     |
| 10 day | 2       | 2.1     | 2.3     | 2.2     | 2.2     | 2.1     |
| 15 day | 2.1     | 2.4     | 2.2     | 2.1     | 2.1     | 2       |
| 35 day | 2.4     | 2.6     | 2.4     | 2.3     | 2.4     | 2.3     |

|        | Group 4 |
|--------|---------|---------|---------|---------|---------|---------|
| 0 day  | 2.1     | 2.1     | 1.9     | 2.3     | 2.1     | 2.4     |
| 5 day  | 2       | 1.9     | 2       | 2.3     | 2.1     | 2.1     |
| 10 day | 2.3     | 1.9     | 2.1     | 2.4     | 2.4     | 2.3     |
| 15 day | 2.4     | 2.1     | 2       | 2       | 2.4     | 2.3     |
| 35 day | 2.6     | 2.4     | 2.5     | 2.3     | 2.4     | 2.6     |

|        | Group 5 |
|--------|---------|---------|---------|---------|---------|---------|
| 0 day  | 2.2     | 2.3     | 2.1     | 2.2     | 2.1     | 2.1     |
| 5 day  | 2       | 2.1     | 2.2     | 2.1     | 1.9     | 1.9     |
| 10 day | 2.2     | 2.1     | 2.3     | 2       | 2.1     | 2       |
| 15 day | 2.1     | 2       | 2.4     | 2.1     | 2.2     | 2.4     |
| 35 day | 2.3     | 2.5     | 2.7     | 2.4     | 2.4     | 2.4     |

|        | Group 6 |
|--------|---------|---------|---------|---------|---------|---------|
| 0 day  | 2       | 2       | 2       | 2.3     | 2.3     | 2.5     |
| 5 day  | 2       | 1.8     | 1.7     | 2       | 2.2     | 2.3     |
| 10 day | 2.1     | 1.8     | 1.6     | 2.1     | 2.3     | 1.7     |
| 15 day | 2       | 1.7     | 1.5     | 2.1     | 2.1     | 1.8     |
| 35 day | 2.4     | 1.9     | 2       | 2.4     | 2.3     | 2.1     |
