# Supplementary material for: Efficacy of Rg1-Oil Adjuvant on Inducing Immune Responses against Bordetella bronchiseptica in Rabbits
Source: Hindawi journal article supplement (doi:10.1155/2021/8835919), 2021-01-28
Supplement: f1 [file 8835919.f1.zip]

|        | Group 1  | Group 1  | Group 1 |
|--------|----------|----------|---------|
| 0 day  | 0.150167 | 0.056148 | 5       |
| 5 day  | 0.564775 | 0.098538 | 5       |
| 10 day | 0.948633 | 0.151446 | 5       |
| 15 day | 0.8265   | 0.160782 | 5       |
| 21 day | 0.9184   | 0.0352   | 5       |

|        | Group 2  | Group 2  | Group 2 |
|--------|----------|----------|---------|
| 0 day  | 0.2311   | 0.095787 | 5       |
| 5 day  | 0.924367 | 0.084939 | 5       |
| 10 day | 2.031333 | 0.104932 | 5       |
| 15 day | 2.281925 | 0.205963 | 5       |
| 21 day | 2.60622  | 0.134617 | 5       |

|        | Group 3  | Group 3  | Group 3 |
|--------|----------|----------|---------|
| 0 day  | 0.176433 | 0.059127 | 5       |
| 5 day  | 0.2396   | 0.083924 | 5       |
| 10 day | 1.252433 | 0.10283  | 5       |
| 15 day | 1.846825 | 0.082828 | 5       |
| 21 day | 2.209925 | 0.220962 | 5       |

|        | Group 4  | Group 4  | Group 4 |
|--------|----------|----------|---------|
| 0 day  | 0.129667 | 0.029238 | 5       |
| 5 day  | 0.297925 | 0.09606  | 5       |
| 10 day | 0.5751   | 0.142851 | 5       |
| 15 day | 1.153767 | 0.397665 | 5       |
| 21 day | 2.00525  | 0.506904 | 5       |

|        | Group 5  | Group 5  | Group 5 |
|--------|----------|----------|---------|
| 0 day  | 0.1492   | 0.056055 | 5       |
| 5 day  | 0.289225 | 0.091186 | 5       |
| 10 day | 0.595133 | 0.117874 | 5       |
| 15 day | 0.66775  | 0.059207 | 5       |
| 21 day | 0.656725 | 0.12359  | 5       |

|        | Group 6  | Group 6  | Group 6 |
|--------|----------|----------|---------|
| 0 day  | 0.187467 | 0.061647 | 5       |
| 5 day  | 0.410825 | 0.195541 | 5       |
| 10 day | 0.6208   | 0.101606 | 5       |
| 15 day | 0.707767 | 0.22233  | 5       |
| 21 day | 0.807475 | 0.324222 | 5       |
