# Supplementary material for: Efficacy of Rg1-Oil Adjuvant on Inducing Immune Responses against Bordetella bronchiseptica in Rabbits
Source: Hindawi journal article supplement (doi:10.1155/2021/8835919), 2021-01-28
Supplement: f1 [file 8835919.f1.zip]

|        |           |           |           |           |           |           |           |           |
|--------|-----------|-----------|-----------|-----------|-----------|-----------|-----------|-----------|
|        | Group 1   |
| 10 day | 7. 321928 | 8. 321928 | 7. 321928 | 8. 321928 | 5. 321928 | 9. 321928 | 8. 321928 |           |
| 15 day | 5. 321928 | 7. 321928 | 8. 321928 | 7. 321928 | 7. 321928 | 7. 321928 | 9. 321928 |           |
| 21 day | 8. 321928 | 7. 321928 | 7. 321928 | 8. 321928 | 7. 321928 |           |           |           |
| 35 day | 7. 321928 | 7. 321928 | 8. 321928 | 8. 321928 | 6. 321928 |           |           |           |
|        | Group 2   |           |
| 10 day | 11. 32193 | 10. 32193 | 10. 32193 | 11. 32193 | 11. 32193 | 11. 32193 |           |           |
| 15 day | 12. 32193 | 14. 32193 | 12. 32193 | 12. 32193 | 13. 32193 | 13. 32193 | 12. 32193 |           |
| 21 day | 13. 32193 |           |           | 14. 32193 | 14. 32193 | 13. 32193 |           |           |
| 35 day | 14. 32193 |           |           | 14. 32193 | 14. 32193 | 13. 32193 |           |           |
|        | Group 3   |           |
| 10 day | 10. 32193 | 10. 32193 |           | 10. 32193 |           | 9. 321928 |           |           |
| 15 day | 12. 32193 | 13. 32193 | 11. 32193 | 13. 32193 |           | 12. 32193 | 12. 32193 |           |
| 21 day | 13. 32193 | 13. 32193 |           | 13. 32193 | 12. 32193 |           |           |           |
| 35 day | 13. 32193 | 13. 32193 |           | 13. 32193 | 13. 32193 |           |           |           |
|        | Group 4   |
| 10 day | 9. 321928 | 7. 321928 | 5. 321928 | 7. 321928 | 8. 321928 | 7. 321928 | 8. 321928 |           |
| 15 day | 6. 321928 | 9. 321928 | 8. 321928 | 8. 321928 | 5. 321928 | 6. 321928 | 9. 321928 |           |
| 21 day | 10. 32193 | 9. 321928 |           | 9. 321928 | 9. 321928 | 9. 321928 |           | 9. 321928 |
| 35 day | 8. 321928 | 8. 321928 | 7. 321928 | 8. 321928 | 8. 321928 | 9. 321928 | 7. 321928 | 8. 321928 |
|        | Group 5   |           |
| 10 day | 9. 321928 | 8. 321928 | 8. 321928 | 7. 321928 | 7. 321928 | 9. 321928 |           |           |
| 15 day | 9. 321928 | 10. 32193 | 8. 321928 | 9. 321928 | 9. 321928 | 9. 321928 | 11. 32193 |           |
| 21 day | 9. 321928 | 10. 32193 | 10. 32193 | 7. 321928 |           |           |           |           |
| 35 day | 8. 321928 | 9. 321928 | 10. 32193 | 9. 321928 | 10. 32193 | 8. 321928 |           |           |
|        | Group 6   |           |
| 10 day | 8. 321928 | 7. 321928 | 8. 321928 |           |           | 6. 321928 |           |           |
| 15 day | 8. 321928 | 9. 321928 | 9. 321928 |           | 9. 321928 |           | 7. 321928 |           |
| 21 day | 8. 321928 | 8. 321928 | 5. 321928 | 6. 321928 |           | 9. 321928 | 9. 321928 |           |
| 35 day | 7. 321928 | 5. 321928 | 6. 321928 |           | 8. 321928 | 8. 321928 |           |           |
