# Supplementary material for: Efficacy of Rg1-Oil Adjuvant on Inducing Immune Responses against Bordetella bronchiseptica in Rabbits
Source: Hindawi journal article supplement (doi:10.1155/2021/8835919), 2021-01-28
Supplement: f1 [file 8835919.f1.zip]

|        | IL-4     | IL-4     | IL-4     |
|--------|----------|----------|----------|
| Group1 | 574.5    | 501      | 542      |
| Group2 | 270.6667 | 279      | 334.1667 |
| Group3 | 204.5    | 191.1667 | 187.8333 |
| Group4 | 143.6667 | 106.3333 | 108.3333 |
| Group5 | 139      | 132.1667 | 178.8333 |
| Group6 | 129.5    | 115.1667 | 95.66666 |
