# Supplementary material for: Efficacy of Rg1-Oil Adjuvant on Inducing Immune Responses against Bordetella bronchiseptica in Rabbits
Source: Hindawi journal article supplement (doi:10.1155/2021/8835919), 2021-01-28
Supplement: f1 [file 8835919.f1.zip]

|        | IL-4  | IL-4  | IL-4  |
|--------|-------|-------|-------|
| Group1 | 355.5 | 536   | 396.5 |
| Group2 | 329   | 248.5 | 239   |
| Group3 | 396   | 395.5 | 405   |
| Group4 | 124.5 | 274.5 | 320.5 |
| Group5 | 104   | 315.5 | 122.5 |
| Group6 | 151   | 123.5 | 190.5 |
