# Supplementary material for: Efficacy of Rg1-Oil Adjuvant on Inducing Immune Responses against Bordetella bronchiseptica in Rabbits
Source: Hindawi journal article supplement (doi:10.1155/2021/8835919), 2021-01-28
Supplement: f1 [file 8835919.f1.zip]

|        | W-LCC/(×W-LCC/(×W-LCC/(×103/ $\mu$ L) |     |     |
|--------|---------------------------------------|-----|-----|
| Group1 | 1.7                                   | 2.1 | 1.7 |
| Group2 | 2                                     | 2.6 | 1.6 |
| Group3 | 3.1                                   | 2.1 | 1.9 |
| Group4 | 1.5                                   | 2.9 | 1.9 |
| Group5 | 0.8                                   | 0.5 | 0.5 |
| Group6 | 0.3                                   | 0.3 | 0.4 |
