# Supplementary material for: Efficacy of Rg1-Oil Adjuvant on Inducing Immune Responses against Bordetella bronchiseptica in Rabbits
Source: Hindawi journal article supplement (doi:10.1155/2021/8835919), 2021-01-28
Supplement: f1 [file 8835919.f1.zip]

| RT-PCR | NF-KB    | ExperimentB |          |
|--------|----------|-------------|----------|
| Group1 | 1        | 0.764023    | 0.810655 |
| Group2 | 1.388251 | 2.171693    | 1.711031 |
| Group3 | 0.63702  | 0.49333     | 0.570273 |
| Group4 | 4.783144 | 4.803721    | 3.556127 |
| Group5 | 2.444574 | 2.137017    | 1.024019 |
| Group6 | 0.354984 | 0.255429    | 0.220419 |
