# Supplementary material for: Efficacy of Rg1-Oil Adjuvant on Inducing Immune Responses against Bordetella bronchiseptica in Rabbits
Source: Hindawi journal article supplement (doi:10.1155/2021/8835919), 2021-01-28
Supplement: f1 [file 8835919.f1.zip]

RT-PCR    TLR-2    ExperimentB

|        |          |          |          |
|--------|----------|----------|----------|
| Group1 | 1        | 1.045658 | 1.093615 |
| Group2 | 0.447692 | 0.507578 | 0.421096 |
| Group3 | 0.150468 | 0.151087 | 0.159759 |
| Group4 | 0.347849 | 0.351311 | 0.343959 |
| Group5 | 0.231395 | 0.254379 | 0.19284  |
| Group6 | 0.033862 | 0.028051 | 0.027683 |
