# Supplementary material for: Efficacy of Rg1-Oil Adjuvant on Inducing Immune Responses against Bordetella bronchiseptica in Rabbits
Source: Hindawi journal article supplement (doi:10.1155/2021/8835919), 2021-01-28
Supplement: f1 [file 8835919.f1.zip]

|        | IL-2 35 c | IL-2 35 c | IL-2 35 days post immune |
|--------|-----------|-----------|--------------------------|
| Group1 | 68.51724  | 54.10345  | 45.41379                 |
| Group2 | 19.51724  | 20        | 13.89655                 |
| Group3 | 5.793103  | 4.793103  | 10.37931                 |
| Group4 | 11.96552  | 10.55172  | 9.724138                 |
| Group5 | 11.10345  | 8.344828  | 5.655172                 |
| Group6 | 1.586207  | 3.793103  | 8.379311                 |
