# Supplementary material for: Efficacy of Rg1-Oil Adjuvant on Inducing Immune Responses against Bordetella bronchiseptica in Rabbits
Source: Hindawi journal article supplement (doi:10.1155/2021/8835919), 2021-01-28
Supplement: f1 [file 8835919.f1.zip]

|        | PLT/( $\times 10^9$ /L) | PLT/( $\times 10^9$ /L) | PLT/( $\times 10^9$ /L) |
|--------|-------------------------|-------------------------|-------------------------|
| Group1 | 613                     | 612                     | 531                     |
| Group2 | 577                     | 576                     | 595                     |
| Group3 | 615                     | 635                     | 633                     |
| Group4 | 561                     | 574                     | 523                     |
| Group5 | 177                     | 280                     | 206                     |
| Group6 | 303                     | 271                     | 286                     |
