# Supplementary material for: Efficacy of Rg1-Oil Adjuvant on Inducing Immune Responses against Bordetella bronchiseptica in Rabbits
Source: Hindawi journal article supplement (doi:10.1155/2021/8835919), 2021-01-28
Supplement: f1 [file 8835919.f1.zip]

|        | Group 1 |
|--------|---------|---------|---------|---------|---------|
| 10 day | 4.7     | 7.1     | 4       | 7       | 9.5     |
| 15 day | 6       |         | 6.9     | 6       | 6.4     |
| 21 day | 7.9     | 6.4     | 6.3     | 5.4     |         |
| 35 day | 8.5     | 7.3     | 9       | 7.8     | 9.1     |

|        | Group 2 |
|--------|---------|---------|---------|---------|---------|
| 10 day | 8.8     | 4.1     | 4.1     | 5.8     | 7.9     |
| 15 day | 7       | 6.7     | 6.9     | 8.9     | 7.6     |
| 21 day | 9.9     | 8.7     | 8.3     |         | 8       |
| 35 day | 7.7     | 11.1    | 8.8     | 7.6     | 10.6    |

|        | Group 3 |
|--------|---------|---------|---------|---------|---------|
| 10 day | 5.1     | 3.5     | 4.6     | 9.2     | 5.5     |
| 15 day | 8.9     | 7.3     | 6.3     |         | 6.2     |
| 21 day | 7.6     | 7.3     | 4.5     | 7.4     | 3.8     |
| 35 day | 7.7     | 5.5     | 7.5     |         | 5.9     |

|        | Group 4 |
|--------|---------|---------|---------|---------|---------|
| 10 day | 3.3     | 5       |         |         | 4.6     |
| 15 day | 4.3     | 6.5     | 6.5     |         |         |
| 21 day | 6       | 6.6     |         | 4.6     | 5.2     |
| 35 day | 5.7     | 6.4     | 3.7     |         | 4.8     |

|        | Group 5 |
|--------|---------|---------|---------|---------|---------|---------|
| 10 day | 3.9     | 5.9     | 4.1     | 3.5     |         |         |
| 15 day | 3.8     | 6.1     | 6.4     | 7.6     | 4.9     |         |
| 21 day | 4.3     | 4.5     | 4.9     | 5.4     | 4.5     |         |
| 35 day | 5.3     | 9.7     | 5       | 6.3     | 4.4     | 8.7     |

|        | Group 6 |
|--------|---------|---------|---------|---------|---------|---------|
| 10 day | 2.5     | 2       | 5.6     | 4.3     |         |         |
| 15 day | 3.4     | 4.3     | 5.7     | 4.5     | 4.3     |         |
| 21 day | 6.1     | 5.4     | 4.3     | 4.2     | 4.9     |         |
| 35 day | 5.9     | 6.6     |         | 5.1     | 6.1     | 7.4     |
