# Supplementary material for: Efficacy of Rg1-Oil Adjuvant on Inducing Immune Responses against Bordetella bronchiseptica in Rabbits
Source: Hindawi journal article supplement (doi:10.1155/2021/8835919), 2021-01-28
Supplement: f1 [file 8835919.f1.zip]

|        | W-SCC/(×W-SCC/(×W-SCC/(×103/μ L) |     |     |
|--------|----------------------------------|-----|-----|
| Group1 | 9                                | 8.2 | 9.1 |
| Group2 | 8                                | 8.2 | 8.7 |
| Group3 | 8.6                              | 8.1 | 9   |
| Group4 | 5.9                              | 5.9 | 5.4 |
| Group5 | 4.4                              | 4.1 | 3.7 |
| Group6 | 3.3                              | 3.5 | 2.7 |
