# Supplementary material for: Efficacy of Rg1-Oil Adjuvant on Inducing Immune Responses against Bordetella bronchiseptica in Rabbits
Source: Hindawi journal article supplement (doi:10.1155/2021/8835919), 2021-01-28
Supplement: f1 [file 8835919.f1.zip]

|        | 15 days | 15 days | 15 days | 30 days | 30 days | 30 days | days post immunization |
|--------|---------|---------|---------|---------|---------|---------|------------------------|
| Group1 | 0.45    | 0.403   | 0.499   | 1.015   | 0.866   | 0.695   |                        |
| Group2 | 0.347   | 0.369   | 0.387   | 0.729   | 0.814   | 0.727   |                        |
| Group3 | 0.349   | 0.343   | 0.317   | 0.637   | 0.811   | 0.814   |                        |
| Group4 | 0.588   | 0.358   | 0.47    | 0.685   | 0.75    | 0.734   |                        |
| Group5 | 0.263   | 0.214   | 0.203   | 0.349   | 0.332   | 0.459   |                        |
| Group6 | 0.126   | 0.143   | 0.196   | 0.228   | 0.22    | 0.207   |                        |
