# Supplementary material for: Efficacy of Rg1-Oil Adjuvant on Inducing Immune Responses against Bordetella bronchiseptica in Rabbits
Source: J Immunol Res. 2021 Jan 28;2021:8835919. doi: 10.1155/2021/8835919 (PMC7864750; doi:10.1155/2021/8835919)
Supplement: Supplementary Materials — Concise supplementary material description: W-SCC: in Experiment B (Figure 2). W-MCC: in Experiment B (Figure 2). W-LCC: in Experiment B (Figure 2). WBC-1: in Experiment B (Figure 2). SCC cell detection: in Experiment A (Figure 1). PLT: in Experiment B (Figure 2). OD450nm: in Experiment A (Figure 1). IL-4 35 days postimmunization: in Experiment B (Figure 4). IL-2 35 days postimmunization: in Experiment B (Figure 4). Body weight: in Experiment A (Figure 3). IL-4 15 days postimmunization: in Experiment B (Figure 4). IL-2 15 days postimmunization: in Experiment B (Figure 4). IgG: in Experiment B (Figure 2). WBC cell detection: in Experiment A (Figure 1). Bb antibody agglutination: in Experiment A (Figure 1). [file 8835919.f1.zip]

Archive with 18 entries (17 files):
- Supplementary file/
- Supplementary file/Bb antibody agglutination.pdf
- Supplementary file/Body weight.pdf
- Supplementary file/IgG.pdf
- Supplementary file/IL-2 15 days post immunization.pdf
- Supplementary file/IL-2 35 days post immuniztion.pdf
- Supplementary file/IL-4 15 days post immunization.pdf
- Supplementary file/IL-4 35 days post immunization.pdf
- Supplementary file/NF-KB RT-PCR.pdf
- Supplementary file/OD450nm.pdf
- Supplementary file/PLT.pdf
- Supplementary file/SCC cell detection.pdf
- Supplementary file/TLR2 RT-PCR.pdf
- Supplementary file/W-LCC.pdf
- Supplementary file/W-MCC.pdf
- Supplementary file/W-SCC.pdf
- Supplementary file/WBC-1.pdf
- Supplementary file/_WBC cell detection.pdf
